# Supplementary material for: Assessing antigenic drift and phylogeny of influenza A (H1N1) pdm09 virus in Kenya using HA1 sub-unit of the hemagglutinin gene
Source: PubMed Central journal article supplement (PMC7012450; doi:10.1371/journal.pone.0228029), 2020-02-11

**S1 Fig. Alignment of HA1 amino acid sequences of A/H1N1 pdm09 strains isolated in Kenya in 2015 with foreign strains, relative to vaccine virus A/California/7/2009.**

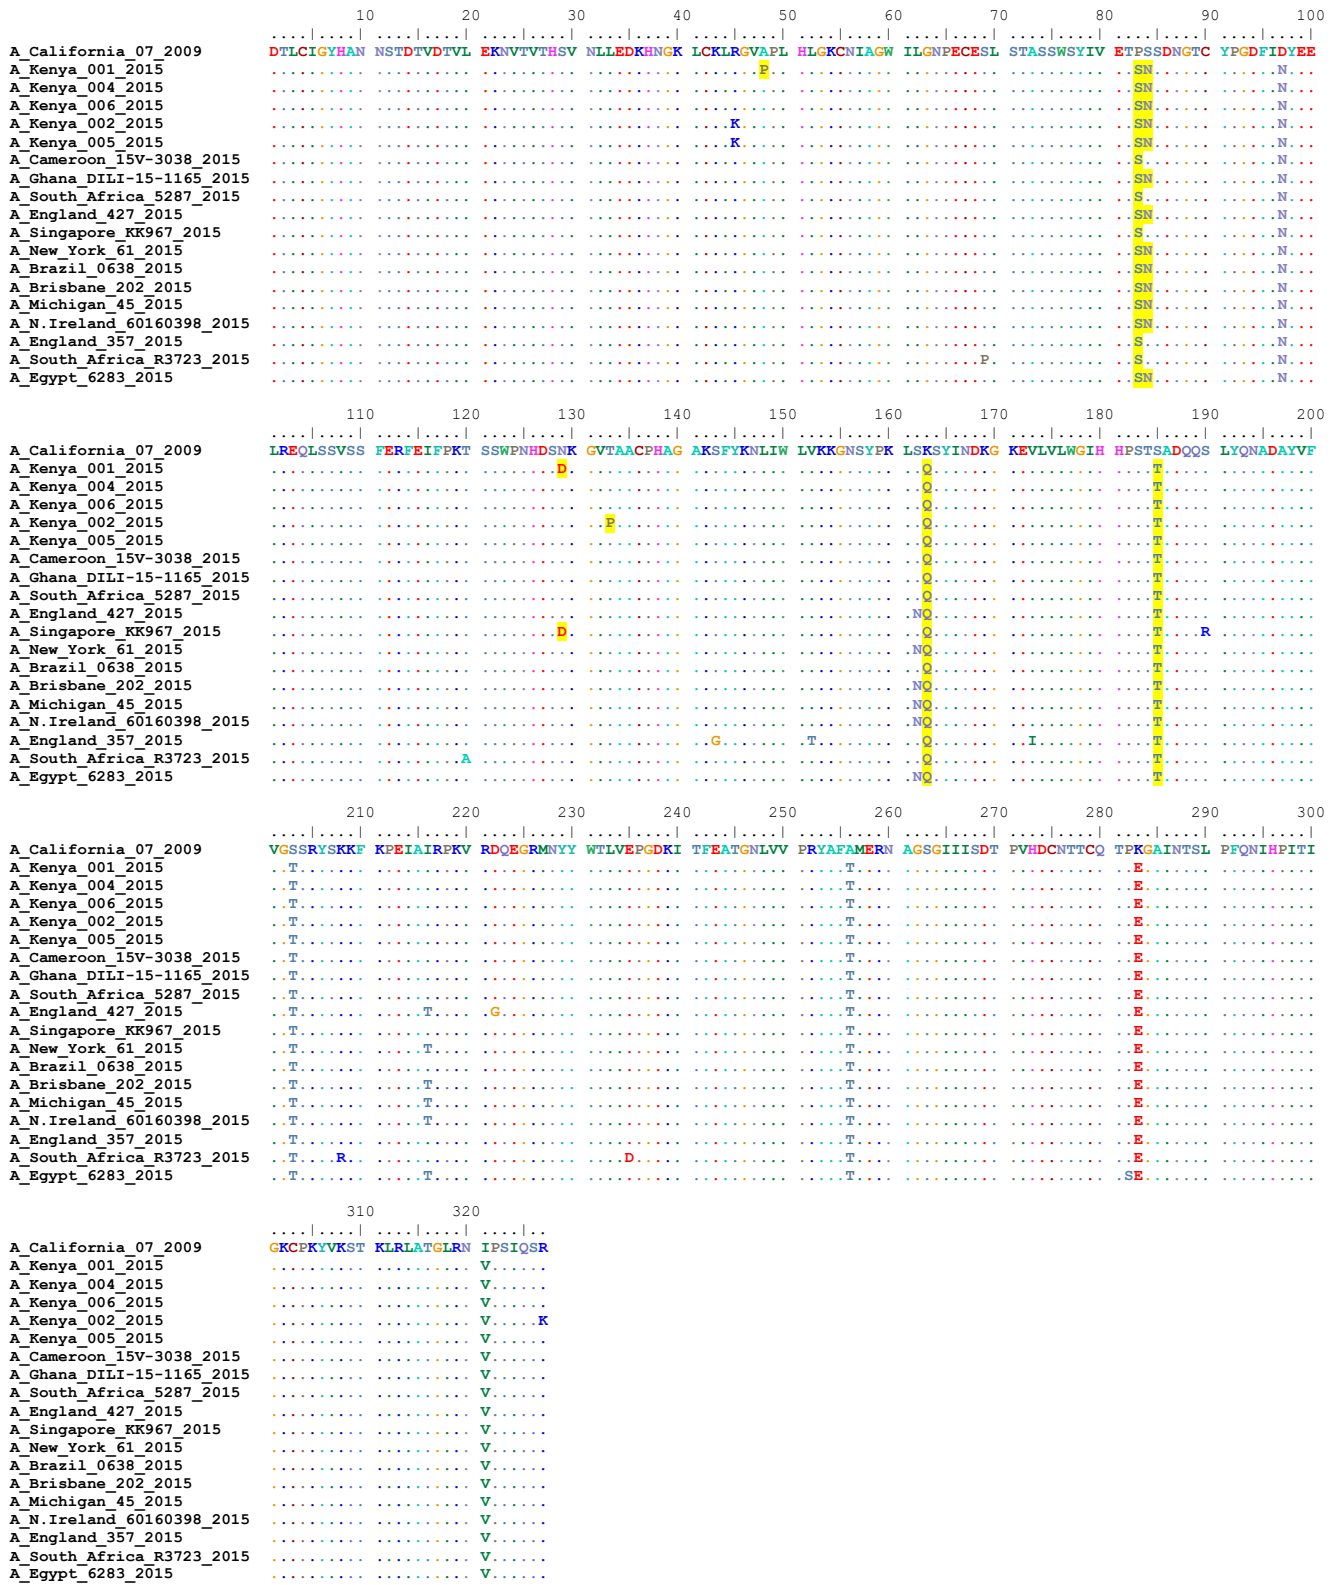

Supplement: pone.0228029.s002.pdf [file pone.0228029.s002.pdf]
