# Supplementary material for: Assessing antigenic drift and phylogeny of influenza A (H1N1) pdm09 virus in Kenya using HA1 sub-unit of the hemagglutinin gene
Source: PubMed Central journal article supplement (PMC7012450; doi:10.1371/journal.pone.0228029), 2020-02-11
Supplement: pone.0228029.s004.pdf [file pone.0228029.s004.pdf]

**S3 Fig. Alignment of HA1 amino acid sequences of A/H1N1 pdm09 strains isolated in Kenya in 2017 with foreign strains, relative to vaccine virus A/Michigan/45/2015.**

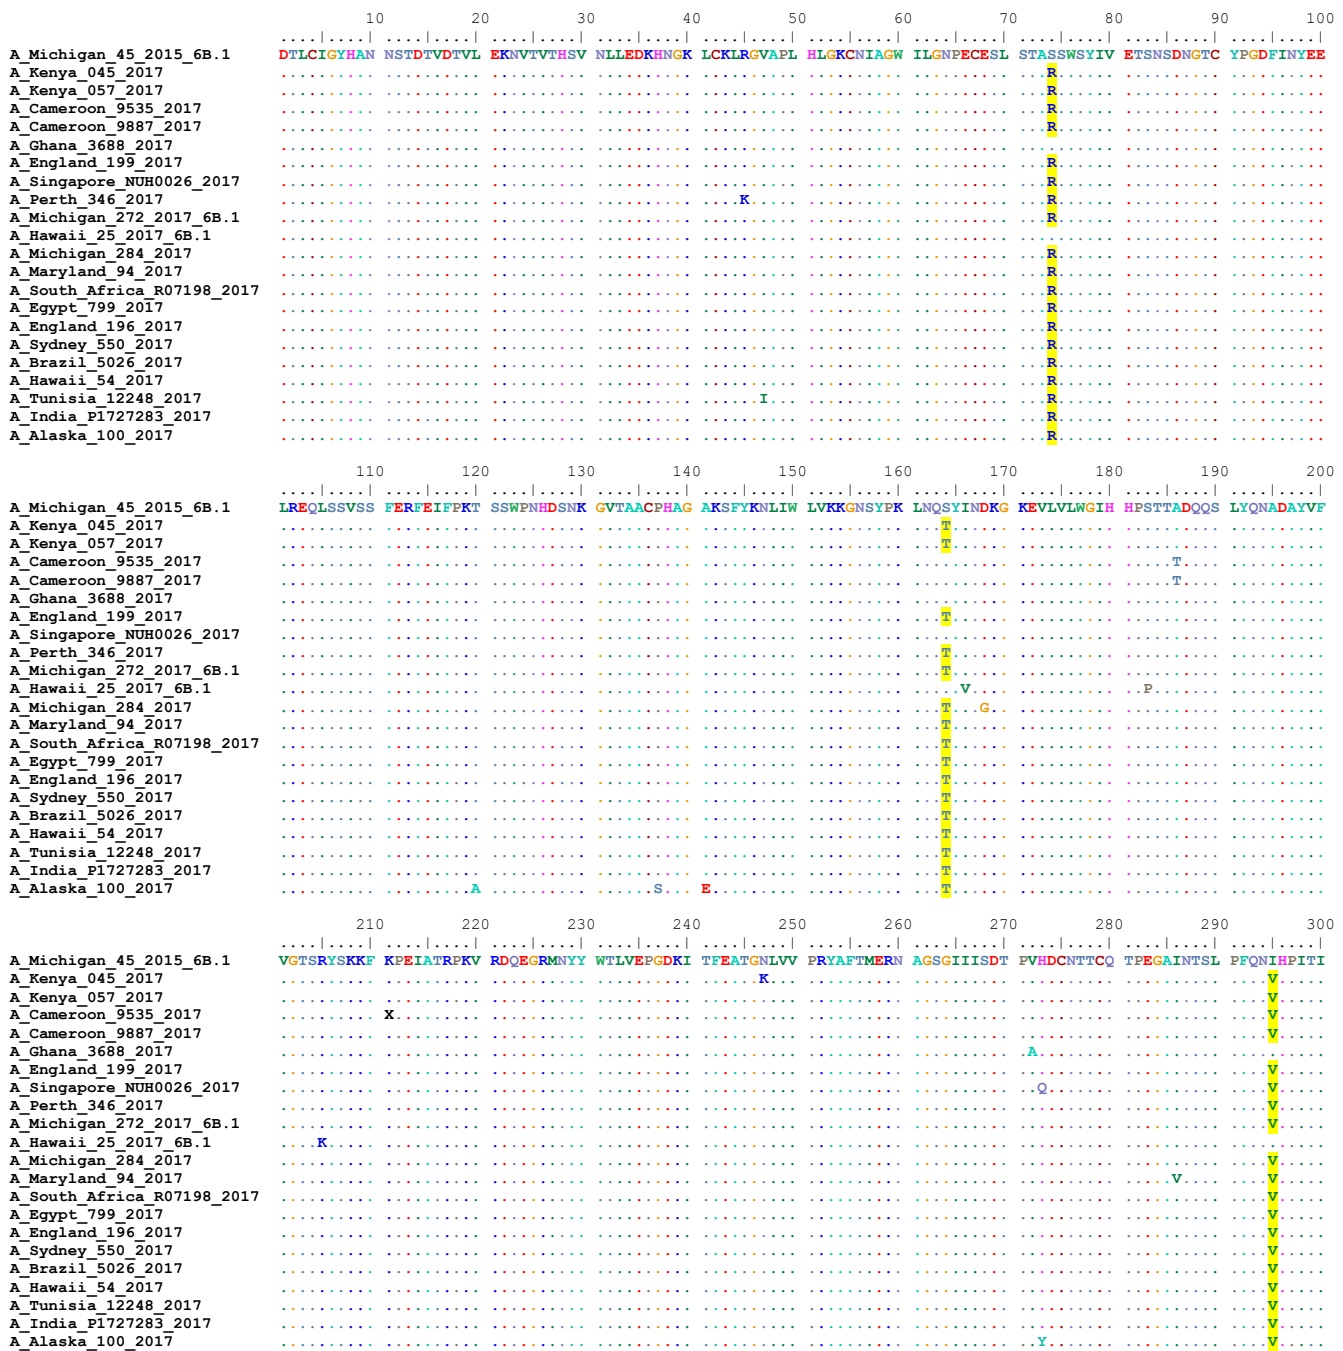

```

.....|.....|.....|.....|.....|
A_Michigan_45_2015_6B.1 GKCPKYVKST KLRLATGLRN VPSIQSR
A_Kenya_045_2017 .....
A_Kenya_057_2017 .....
A_Cameroon_9535_2017 .....
A_Cameroon_9887_2017 .....
A_Ghana_3688_2017 .....V.....
A_England_199_2017 .....
A_Singapore_NUH0026_2017 .....
A_Perth_346_2017 .....
A_Michigan_272_2017_6B.1 .....
A_Hawaii_25_2017_6B.1 .....
A_Michigan_284_2017 .....
A_Maryland_94_2017 .....
A_South_Africa_R07198_2017 .....
A_Egypt_799_2017 .....
A_England_196_2017 .....
A_Sydney_550_2017 ..... N.....
A_Brazil_5026_2017 .....
A_Hawaii_54_2017 .....
A_Tunisia_12248_2017 .....
A_India_PL1727283_2017 .....
A_Alaska_100_2017 .....

```
