# Supplementary material for: Assessing antigenic drift and phylogeny of influenza A (H1N1) pdm09 virus in Kenya using HA1 sub-unit of the hemagglutinin gene
Source: PubMed Central journal article supplement (PMC7012450; doi:10.1371/journal.pone.0228029), 2020-02-11
Supplement: pone.0228029.s005.pdf [file pone.0228029.s005.pdf]

**S4 Fig. Alignment of HA1 amino acid sequences of A/H1N1 pdm09 strains isolated in Kenya in 2018 with foreign strains, relative to vaccine virus A/Michigan/45/2015.**

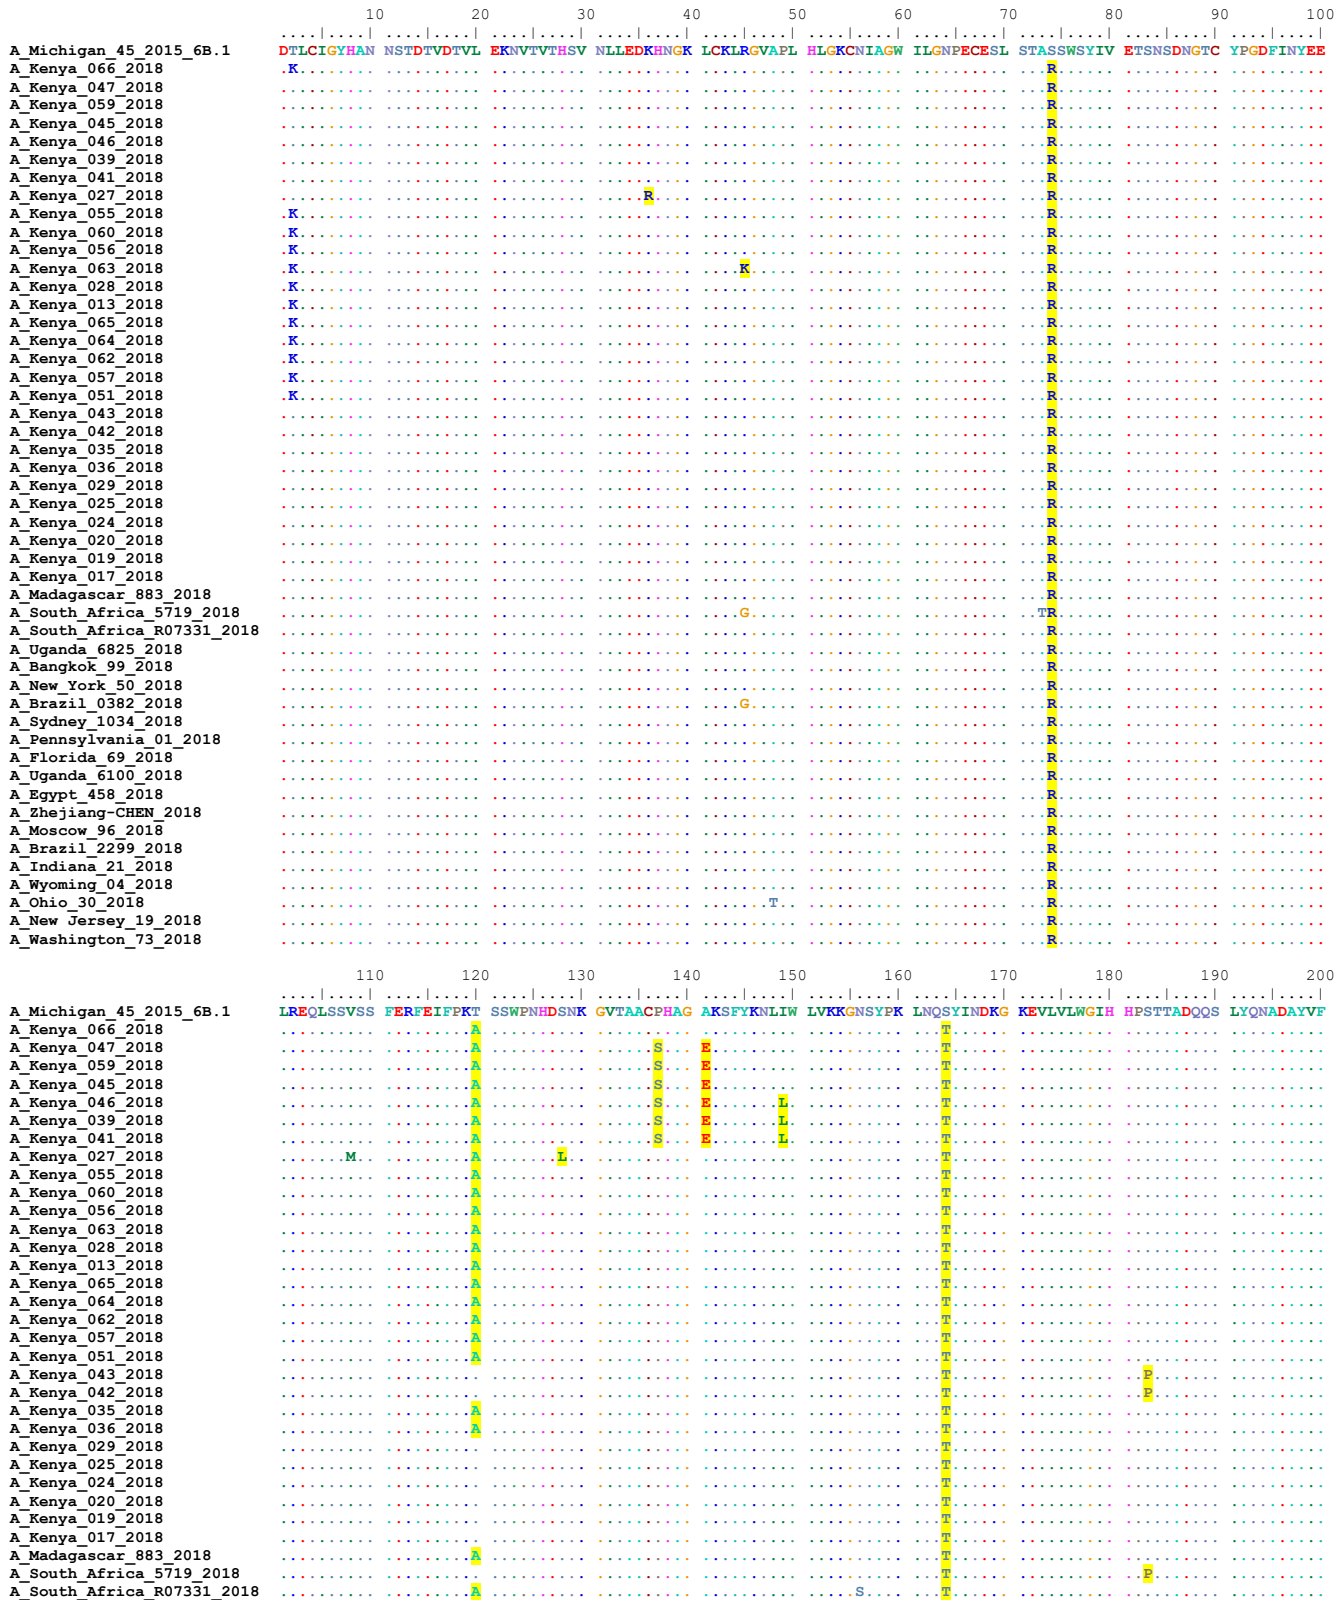

A\_Uganda\_6825\_2018  
 A\_Bangkok\_99\_2018  
 A\_New\_York\_50\_2018  
 A\_Brazil\_0382\_2018  
 A\_Sydney\_1034\_2018  
 A\_Pennsylvania\_01\_2018  
 A\_Florida\_69\_2018  
 A\_Uganda\_6100\_2018  
 A\_Egypt\_458\_2018  
 A\_Zhejiang-CHEN\_2018  
 A\_Moscow\_96\_2018  
 A\_Brazil\_2299\_2018  
 A\_Indiana\_21\_2018  
 A\_Wyoming\_04\_2018  
 A\_Ohio\_30\_2018  
 A\_New\_Jersey\_19\_2018  
 A\_Washington\_73\_2018

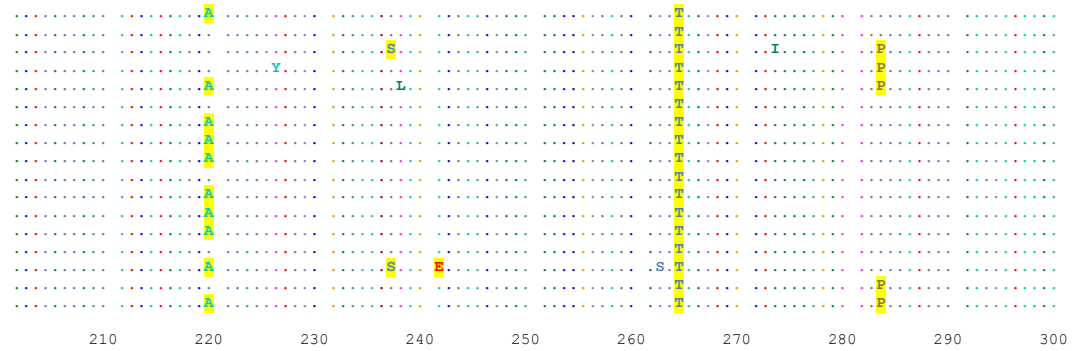

A\_Michigan\_45\_2015\_6B.1  
 A\_Kenya\_066\_2018  
 A\_Kenya\_047\_2018  
 A\_Kenya\_059\_2018  
 A\_Kenya\_045\_2018  
 A\_Kenya\_046\_2018  
 A\_Kenya\_039\_2018  
 A\_Kenya\_041\_2018  
 A\_Kenya\_027\_2018  
 A\_Kenya\_055\_2018  
 A\_Kenya\_060\_2018  
 A\_Kenya\_056\_2018  
 A\_Kenya\_063\_2018  
 A\_Kenya\_028\_2018  
 A\_Kenya\_013\_2018  
 A\_Kenya\_065\_2018  
 A\_Kenya\_064\_2018  
 A\_Kenya\_062\_2018  
 A\_Kenya\_057\_2018  
 A\_Kenya\_051\_2018  
 A\_Kenya\_043\_2018  
 A\_Kenya\_042\_2018  
 A\_Kenya\_035\_2018  
 A\_Kenya\_036\_2018  
 A\_Kenya\_029\_2018  
 A\_Kenya\_025\_2018  
 A\_Kenya\_024\_2018  
 A\_Kenya\_020\_2018  
 A\_Kenya\_019\_2018  
 A\_Kenya\_017\_2018  
 A\_Madagascar\_883\_2018  
 A\_South\_Africa\_5719\_2018  
 A\_South\_Africa\_R07331\_2018  
 A\_Uganda\_6825\_2018  
 A\_Bangkok\_99\_2018  
 A\_New\_York\_50\_2018  
 A\_Brazil\_0382\_2018  
 A\_Sydney\_1034\_2018  
 A\_Pennsylvania\_01\_2018  
 A\_Florida\_69\_2018  
 A\_Uganda\_6100\_2018  
 A\_Egypt\_458\_2018  
 A\_Zhejiang-CHEN\_2018  
 A\_Moscow\_96\_2018  
 A\_Brazil\_2299\_2018  
 A\_Indiana\_21\_2018  
 A\_Wyoming\_04\_2018  
 A\_Ohio\_30\_2018  
 A\_New\_Jersey\_19\_2018  
 A\_Washington\_73\_2018

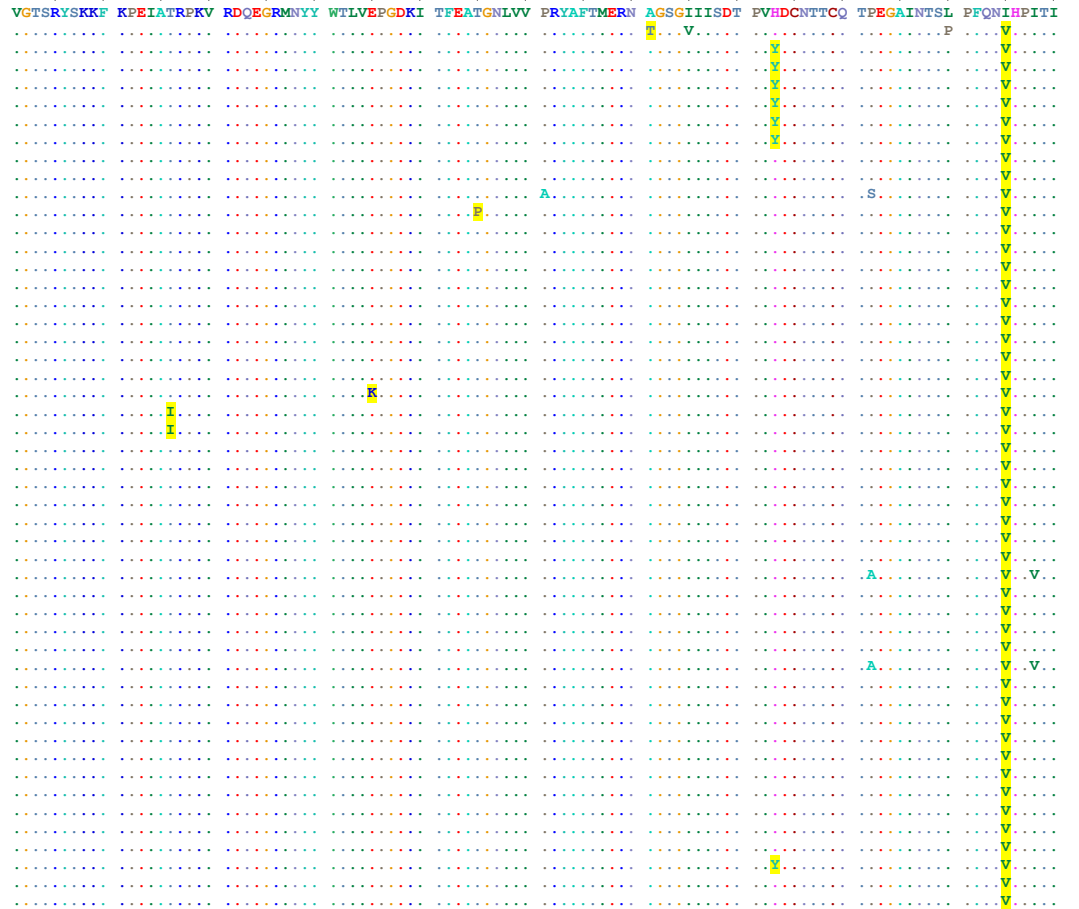

A\_Michigan\_45\_2015\_6B.1  
 A\_Kenya\_066\_2018  
 A\_Kenya\_047\_2018  
 A\_Kenya\_059\_2018  
 A\_Kenya\_045\_2018  
 A\_Kenya\_046\_2018  
 A\_Kenya\_039\_2018  
 A\_Kenya\_041\_2018  
 A\_Kenya\_027\_2018  
 A\_Kenya\_055\_2018  
 A\_Kenya\_060\_2018  
 A\_Kenya\_056\_2018  
 A\_Kenya\_063\_2018  
 A\_Kenya\_028\_2018  
 A\_Kenya\_013\_2018  
 A\_Kenya\_065\_2018  
 A\_Kenya\_064\_2018  
 A\_Kenya\_062\_2018  
 A\_Kenya\_057\_2018  
 A\_Kenya\_051\_2018  
 A\_Kenya\_043\_2018  
 A\_Kenya\_042\_2018  
 A\_Kenya\_035\_2018  
 A\_Kenya\_036\_2018  
 A\_Kenya\_029\_2018  
 A\_Kenya\_025\_2018  
 A\_Kenya\_024\_2018  
 A\_Kenya\_020\_2018  
 A\_Kenya\_019\_2018  
 A\_Kenya\_017\_2018

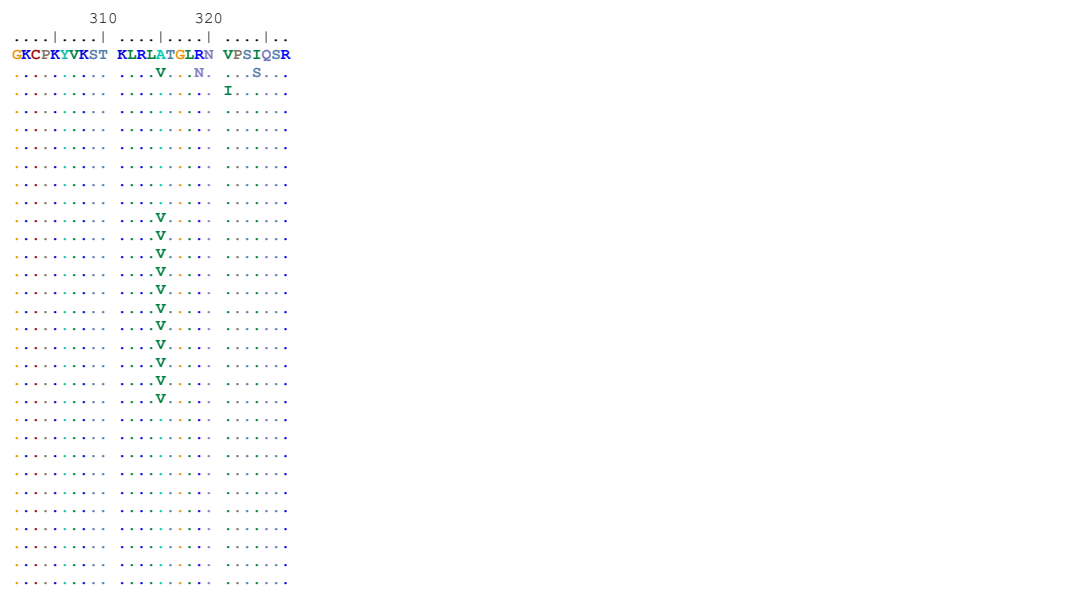

A\_Madagascar\_883\_2018 .....  
A\_South\_Africa\_5719\_2018 .....  
A\_South\_Africa\_R07331\_2018 .....  
A\_Uganda\_6825\_2018 .....  
A\_Bangkok\_99\_2018 .....  
A\_New\_York\_50\_2018 .....  
A\_Brazil\_0382\_2018 .....  
A\_Sydney\_1034\_2018 .....  
A\_Pennsylvania\_01\_2018 .....  
A\_Florida\_69\_2018 .....  
A\_Uganda\_6100\_2018 .....  
A\_Egypt\_458\_2018 .....  
A\_Zhejiang-CHEN\_2018 .....  
A\_Moscow\_96\_2018 .....  
A\_Brazil\_2299\_2018 .....  
A\_Indiana\_21\_2018 .....  
A\_Wyoming\_04\_2018 .....  
A\_Ohio\_30\_2018 .....  
A\_New\_Jersey\_19\_2018 .....  
A\_Washington\_73\_2018 .....
